# Supplementary material for: Development of a high performance high voltage insulator for power transmission lines from blends of polydimethylsiloxane/ethylene vinyl acetate containing nanosilica
Source: Royal Society of Chemistry journal article supplement (doi:10.1039/c5ra08277c), 2015-01-01
Supplement: c5ra08277c1.pdf [file c5ra08277c1.pdf]

**Electronic Supplementary Information (ESI)**

**Development of high performance high voltage insulator for power  
transmission line from blends of polydimethylsiloxane/ethylene vinyl acetate  
containing nanosilica**

D. Ghosh, S. Bhandari, T. K. Chaki, D. Khastgir\*

*Rubber Technology Centre, Indian Institute of Technology Kharagpur*

*Kharagpur-721302, West Bengal, India*

\* Corresponding author: Dipak Khastgir

E-mail ID : khasdi@rtc.iitkgp.ernet.in

Phone: +91 - 3222 – 283192

### *TEM Analysis*

TEM analysis reveals dispersion of filler particles (Fig. S1a-d). The most important criteria are the dispersion of nanosilica in polymer matrix should be homogeneous, because nanosilica is non-reinforcing filler, inhomogeneities may cause the structural defects in the nanocomposite materials. Filler dispersion in polymer matrix can be seen from bulk morphology through Analytical TEM. With increasing nanofiller dispersion and distribution of filler in the matrix are changes. Uniform dispersion and distribution are observed up to 6 phr (fig. S1b) and thereafter nanofiller agglomeration and aggregation are observed.

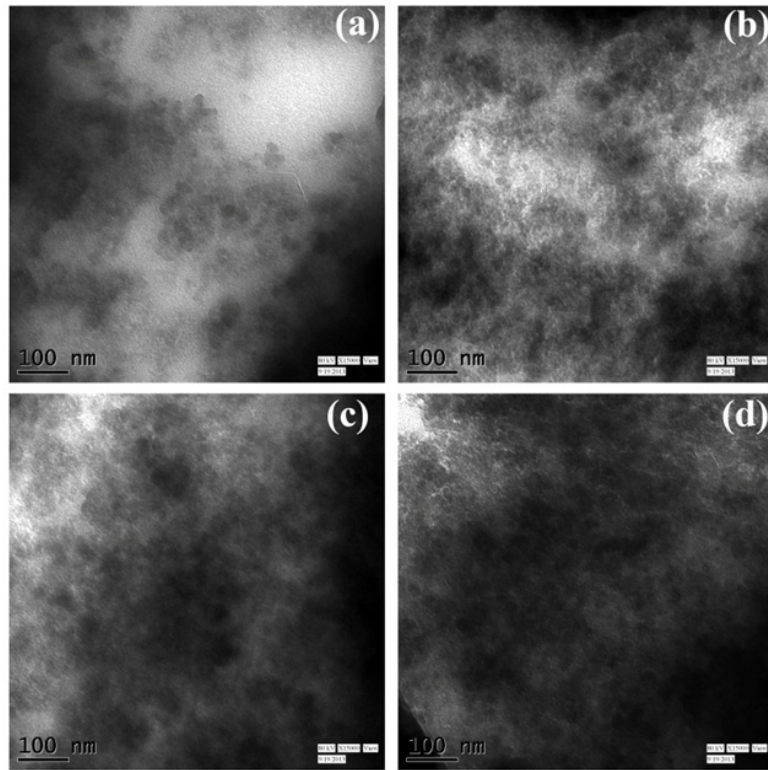

Fig. S1. TEM micrograph of (a) 3, (b) 6, (c) 9 and (d) 12 phr nanosilica filled nanocomposites.

*AFM Analysis*

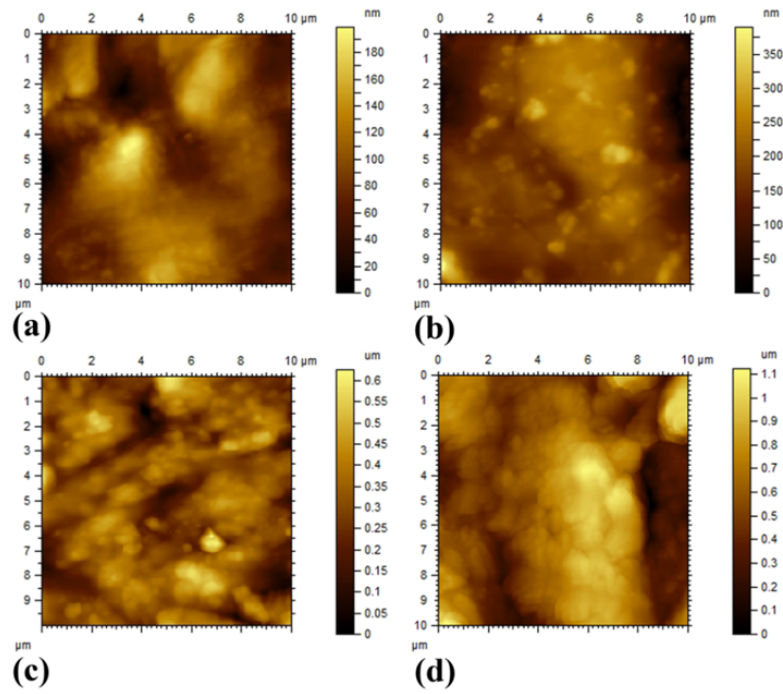

Fig. S2. AFM 2D images of 6 phr nanosilica filled (a) unaged, (b) boiling water, (c) heat and (d) UV aged nanocomposites.

Table S1. Height parameter of 6 phr nanosilica filled (PES6) unaged, boiling water, heat and UV aged nanocomposites.

| Type<br>of aging | Root mean<br>square height<br>( $S_q$ ), nm | Maximum<br>peak height<br>( $S_p$ ), nm | Maximum<br>pit height<br>( $S_v$ ), nm | Maximum<br>height<br>( $S_z$ ), nm | Arithmetic<br>mean height<br>( $S_a$ ), nm |
|------------------|---------------------------------------------|-----------------------------------------|----------------------------------------|------------------------------------|--------------------------------------------|
| Unaged           | 32                                          | 108                                     | 91                                     | 199                                | 26                                         |
| Boiling Water    | 58                                          | 212                                     | 178                                    | 390                                | 44                                         |
| Heat             | 87                                          | 309                                     | 317                                    | 625                                | 67                                         |
| UV               | 207                                         | 526                                     | 596                                    | 1120                               | 172                                        |

*Electrical tracking analysis*

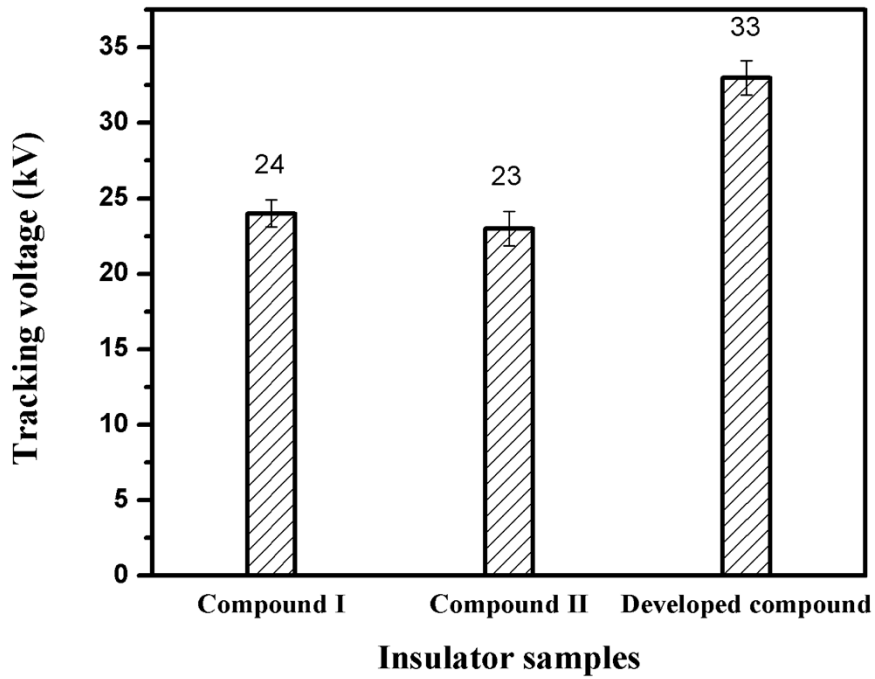

Fig. S3. Comparison of the dry tracking voltage of the developed compound in the present investigation with two commercially available compounds which are generally used for the preparation of the high voltage insulators for power transmission line.
